# Supplementary material
Source: Springer Nature journal article supplement (https://www.springermedizin.de/resource/supplementary/13063_2011_956_MOESM2_ESM.pdf/9618740)
Supplement: MOESM2 [file 9618740]

| <b>Experimental Intervention<br/>(n=105)</b> |
|----------------------------------------------|
| Personal exercise consultation               |
| Personal exercise consultation               |
|                                              |
| Personal exercise consultation               |
| Telephone exercise consultation              |
|                                              |
| Personal exercise consultation               |
| Telephone exercise consultation              |
|                                              |
|                                              |
| Personal exercise consultation               |
| Telephone exercise consultation              |

| <b>Week</b> |
|-------------|
| 1           |
| 2           |
| 3           |
| 4           |
| 5           |
| 6           |
| 7           |
| 8           |
| 9           |
| 10          |
| 11          |
| 12          |

| <b>Control Intervention<br/>(n=105)</b> |
|-----------------------------------------|
| Personal exercise consultation          |
| Personal exercise consultation          |
|                                         |
| Personal exercise consultation          |
| Telephone exercise consultation         |
|                                         |
| Personal exercise consultation          |
| Telephone exercise consultation         |
|                                         |
|                                         |
| Personal exercise consultation          |
| Telephone exercise consultation         |
